# Supplementary material for: Combination of a centrifugal microfluidic device with a solution-loading cartridge for fully automatic molecular diagnostics
Source: Royal Society of Chemistry journal article supplement (doi:10.1039/c9an00900k), 2019-01-01
Supplement: c9an00900k1.pdf [file c9an00900k1.pdf]

**Electronic Supplementary Information (ESI)**

**Combination of a centrifugal microfluidic device with a solution-loading cartridge for fully automatic molecular diagnostics**

Seung Jun Oh<sup>a</sup> and Tae Seok Seo<sup>b,\*</sup>

*<sup>a</sup>Corporate R&D, LG Chem. Ltd., 30, Magokjungang 10-ro, Gangseo-gu, Seoul, 07796, Republic of Korea*

*<sup>b</sup>Department of Chemical Engineering, College of Engineering, Kyung Hee University, 1732, Deogyong-daero, Giheung-gu, Yongin-si, Gyeonggi-do, 17140, Republic of Korea*

\*Corresponding author. E-mail: seots@khu.ac.kr; Phone: +82-31-201-3676; Fax: +82-31-204-

8114

## Materials and methods

### *Preparation of real samples*

*Escherichia coli* O157:H7 (*E. coli* O157:H7, KCTC 1039) and *Vibrio parahaemolyticus* (*V. parahaemolyticus*, KCTC 2729) were purchased from Korean Collection for Type Cultures. *Salmonella enterica subsp. enterica* serovar *typhimurium* (*S. typhimurium*, KCCM 11806) and *Listeria monocytogenes* (*L. monocytogenes*, KCCM 40307) were adopted from Korean Culture Center of Microorganisms. According to the manufacturers' instructions, those bacteria were cultured in designated media; *E. coli* O157:H7 and *S. typhimurium* in a Nutrient Broth (BD Biosciences, CA, USA), *V. parahaemolyticus* in a Nutrient Broth with 3% NaCl, and *L. monocytogenes* in a Brain Heart Infusion Broth (BD Biosciences, CA, USA). We rinsed and diluted the cultured bacteria using 1× PBS buffer (LPS solution, Korea). The diluted bacterial concentrations were measured based on spectrophotometer readings of optical density at 600 nm. Real samples were prepared to prove the feasibility of our system for practical applications. The bacteria were inoculated in milk with a concentration of  $4 \times 10^3$  cells/ $\mu\text{L}$  for singleplex and multiplex detection experiments, and with concentrations of  $4 \times 10^2$ ,  $4 \times 10$  and 4 cells/ $\mu\text{L}$  for limit of detection tests.

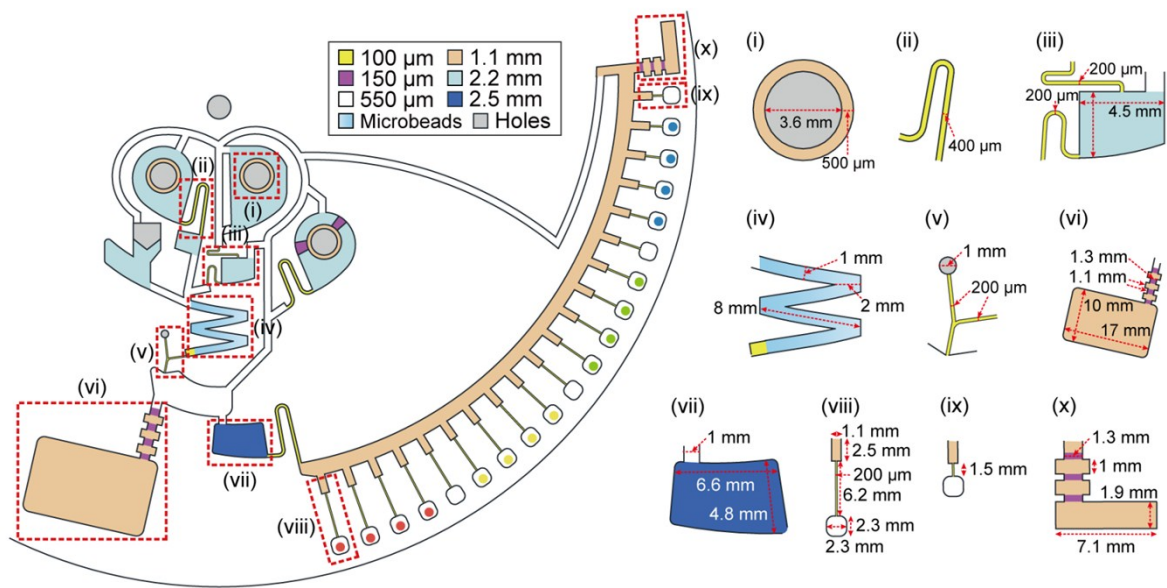

**Figure S1.** Detailed information about the dimensions of the microdevice structures (10 parts)

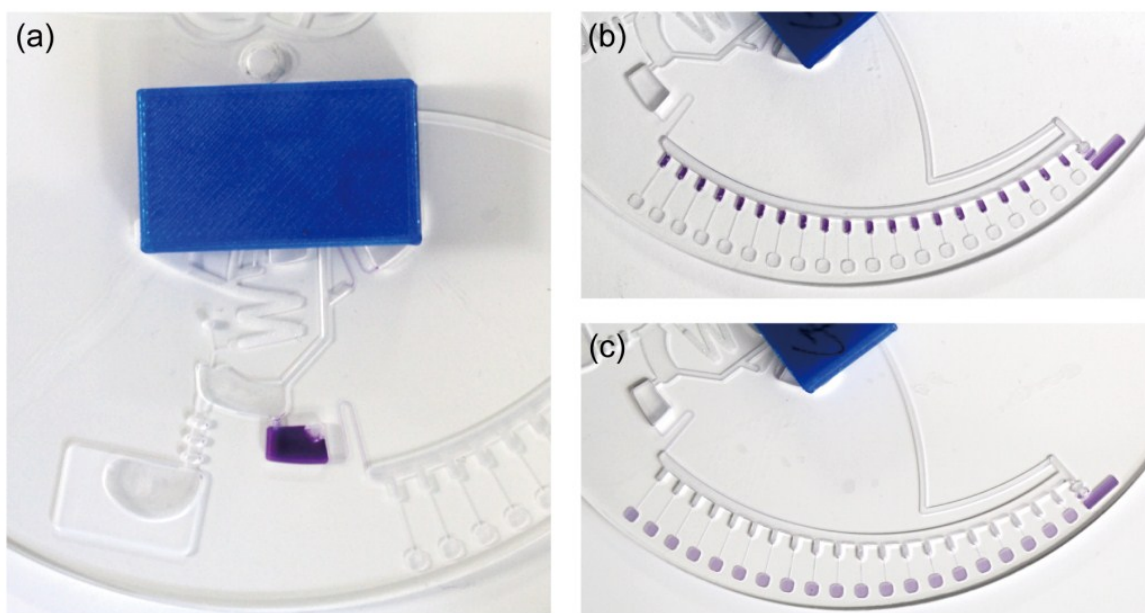

**Figure S2.** Real pictures showing the operation of the microdevice. (a) After the collection of the LAMP cocktail/EBT and eluted DNA (corresponding to Fig. 3f) (b) After the division of the LAMP mixture into 20 aliquots (corresponding to Fig. 3g) (c) After the filling of the 20 reaction chambers with the LAMP mixture (corresponding to Fig. 3h)

**Table S1.** Primer sequence information for the multiplexed LAMP reaction

| Target gene /<br>Accession #                                             | Primer | Sequence (5' to 3')                          | Length<br>[bp] |
|--------------------------------------------------------------------------|--------|----------------------------------------------|----------------|
| <i>E. coli</i> O157:H7<br>fliC gene<br>(CP002967.1 :<br>2147323-2149017) | FIP    | CTACCAACCTGTCTGAAGCGCATCGACATGTTGGACACTTCG   | 42             |
|                                                                          | BIP    | GGTGACTGCGGAATCCAGACGTGAGGCAATTGCATCCATCG    | 41             |
|                                                                          | F3     | GCCTGCTGGATGATCTGC                           | 18             |
|                                                                          | B3     | CGGCTCTGCAACCAAAGA                           | 18             |
| <i>S. typhimurium</i><br>invA gene<br>(M90846.1)                         | FIP    | TCCGCGACACGTTCTGAACCCTCTATTGTCACCGTGGTCC     | 40             |
|                                                                          | BIP    | TGCCGATTTGAAGGCCGGTACAGTACGCTTCGCCGTTC       | 38             |
|                                                                          | F3     | GCGGTGGGTTTTGTTGTCT                          | 19             |
|                                                                          | B3     | CGTAAAGCTGGCTTTCCCTT                         | 20             |
| <i>V. parahaemolyticus</i><br>toxR gene<br>(L11929.1)                    | FIP    | TCGACTCCACATTCCTCGATTACTGATAACTTGCCAGACG     | 41             |
|                                                                          | BIP    | CCTGCCGAATGGCGATTACAATTAATTGTCGATTACGCCG     | 40             |
|                                                                          | F3     | CAACCATGGTGACTGTGA                           | 18             |
|                                                                          | B3     | CCAGCGACCTTTCTCTGA                           | 18             |
| <i>L. monocytogenes</i><br>iap gene<br>(JQ015300.1)                      | FIP    | ATCAAATGTAGTTGGTCCGTTACCAGCTGAAGCTCAAAAACACC | 44             |
|                                                                          | BIP    | ATGTATTTGCTAAAGCGGAATCTGTAGTGCTAGCGTATTGTGC  | 44             |
|                                                                          | F3     | AATTCAAGTGCAAGTGCTAT                         | 20             |
|                                                                          | B3     | GTTTTGCTTGAGATTCAGAGA                        | 21             |

**Table S2.** Rotational speed control protocol for device operation

| Step | Speed [RPM] | Time [s] | Operation                                                  |
|------|-------------|----------|------------------------------------------------------------|
| 1    | 5000        | 60       | DNA binding and bead washing                               |
| 2    | 0           | 10       | Siphon priming                                             |
| 3    | -5000       | 20       | Elution and collection                                     |
| 4    | 0           | 10       | Siphon priming                                             |
| 5    | 1000~-1000  | 10       | Mixing of the LAMP mixture by a shake-mode                 |
| 6    | -1000       | 30       | Aliquoting of the LAMP mixture                             |
| 7    | -5000       | 20       | Transfer of the LAMP mixture aliquots to reaction chambers |
